# Supplementary material for: Irish Cepaea nemoralis Land Snails Have a Cryptic Franco-Iberian Origin That Is Most Easily Explained by the Movements of Mesolithic Humans
Source: PLoS One. 2013 Jun 19;8(6):e65792. doi: 10.1371/journal.pone.0065792 (PMC3686809; doi:10.1371/journal.pone.0065792)
Supplement: Table S1 — Measures of mitochondrial cytochrome oxidase subunit I genetic diversity and neutrality test statistics for samples new to this study. (XLSX) [file pone.0065792.s002.xlsx]

## Sheet: Table S1
						Number of	Nucleotide	Haplotype
Country	Site		Latitude	Longitude	N	haplotypes	diversity#	diversity#	Group	Individual haplotypes
Belgium	Kessel-lo	1	50º 53' 00.48"	4º 43'20.86"	12	6	0.030625	0.8636	D (12)	D7, D8 (2), D29 (2), D30, D31 (2), D39 (4)
	Moortsele	2	50º 57' 31.72"	3º 46' 47.42"	10	2	0.00032	0.2	A (10)	A27, A28 (9)
Croatia	Karlovac	3	45º 29' 33.76"	15º 33' 21.63"	4	4			G (4)	G1, G2, G5, G6
	Zagreb	4	45º 41' 04.83"	15º 56' 20.36"	9	5	0.012844	0.8333	G (9)	G3 (3), G4 (3), G7, G8, G9
Denmark	Aalborg (1)	5	57º 03' 10.38"	9º 52' 9.48"E	6	4	0.001812	0.8667	A (6)	A15, A16 (2), A21 (2), A22
	Aalborg (2)	6	57º 03' 6.6"	9º 52' 21.9"	5	5	0.011397	1	A (5)	A15, A22, A23, A24, A51
	Hilleroed	7	55º 54' 09.79"	12º 14' 31.82"	10	2	0.000852	0.5333	A (10)	A7 (6), A8 (4)
	Kerteminde	8	55º 26' 30"	10º 39' 22.2"	5	5	0.006699	1	A (5)	A33, A34, A35, A41, A103
	Roskilde	9	55º 39' 22.74"	12º 03' 28.74"	11	3	0.003132	0.6545	A (11)	A2 (6), A6 (3), A12 (2)
	Skagen	10	57º 43' 24.59"	10º 35' 06.62"	11	7	0.00493	0.8909	A (11)	A1 (3), A3, A4, A5, A14, A15 (3), A20
	Thisted	11	56º 57' 9.72"	8º 41' 11.94"	3	3			A (3)	A26, A31, A58
England	Fridaythorpe (1)	12	54º 00' 57.84"	-0º 42' 25.44"	4	3			B (4)	B8, B11 (2), B12
	Fridaythorpe (2)	13	54º 00' 24.54"	-0º 42' 21.78"	4	1			B (4)	B12 (4)
	Hampton	14	51º 24' 56.96"	-0º 22' 03.69"	8	2	0.002051	0.4286	B (8)	B4 (6), B5 (2)
	Levant Mine (1)	15	50º 09' 19.5"	-5º 40' 40.62"	7	6	0.003797	0.9524	A (7)	A70 (2), A87, A102, A103, A104, A105
	Levant Mine (2)	16	50º 09' 19.5"	-5º 40' 40.62"	10	4	0.001878	0.5333	A (10)	A87 (7), A106, A107, A108
	Malham	17	54º 07' 11.7"	-2º 10' 49.2"	14	2	0.000228	0.1429	B (14)	B8 (13), B9
	St. Bees	18	54º 29' 21.32"	-3º 35' 22.46"	11	8	0.003828	0.9455	B (11)	B1, B2, B3 (2), B10, B13 (2), B14 (2), B15, B16
	St. Just (1)	19	50º 07' 57.3"	-5º 42' 2.16"	3	3			A (3)	A94, A95, A96
	St. Just (2)	20	50º 08' 46.38"	-5º 40' 23.72"	12	4	0.002223	0.6818	A (12)	A71, A72 (6), A87 (4), A101
	Truro (1)	21	50º 11' 33.65"	-4º 58' 12.06"	12	4	0.001498	0.6515	A (12)	A67, A87 (7), A99 (2), A100 (2)
	Truro (2)	22	50º 09' 32.65"	-4º 59' 16.01"	4	4			A (2), F (2)	A65, A87, F1, F4
	Truro (3)	23	50º 13' 07.68"	-5º 00' 51.47"	3	3			A (3)	A63, A64, A87
	Truro (4)	24	50º 10' 52.08"	-4º 58' 59.99"	2	2			A (2)	A87, A93
	Truro (5)	25	50º 11' 09.89"	-4º 58' 19.80"	6	4	0.005423	0.8667	A (6)	A66 (2), A69, A74, A87 (2)
	Truro (6)	26	50º 15' 17.71"	-5º 02' 35.18"	12	8	0.003311	0.8939	A (12)	A67, A68, A73, A87 (4), A97, A98, A99, A100 (2)
	Truro (7)	27	50º 12' 24.12"	-4º 57' 13.28"	7	3	0.00319	0.6667	A (7)	A75 (4), A87 (2), A93
France	Alencon	28	48º 23' 57.18"	0º 06' 5.04"	12	5	0.005945	0.7879	A (12)	A19, A45, A46 (2), A47 (3), A48 (5)
	Ascou	41	42º 43' 13.62"	1º 51' 50.1"	9	2	0.000709	0.2222	C(9)	C34, C65(8)
	Ax-les-Thermes	42	42º 44' 39.66"	1º 47' 54.78"	11	6	0.00493	0.8727	C(11)	C30, C31(2), C32, C33, C34(3), C71(3)
	Bagneres de Luchon	43	42º 47' 18.84"	0º 35' 26.82"	7	7	0.011544	1	C(7)	C37, C38, C39, C40, C41, C42, C43
	Bayonne*	29	43º 29' 51.40"	-1º 28' 48.72"	8	7	0.023639	0.9643	D (8)	D9, D24, D26 (2), D35, D36, D37, D38
	Carol	44	42º 29' 28.86"	1º 51' 10.2"	10	2	0.000567	0.3556	C(10)	C8(8), C80(2)
	Chantonnay	32	46º 39' 45.42"	-1º 06' 58.02"	5	5	0.066348	1	A (2), B (3)	A17, A18, B6, B7, B8
	Fort Bloque*	30	47º 43' 59.03"	-3º 29' 53.55"	10	5	0.003934	0.8	A (10)	A78 (3), A79, A80 (4), A81, A82
	Gondrin	31	43º 52' 33.9"	0º 11' 52.44"	1	1			A	A62
	La Roche-Bernard	33	47º 30' 42.36"	-2º 17' 8.4"	8	6	0.004272	0.9286	B (8)	B18, B19, B20, B21, B22 (2), B23 (2)
	Le Sableau*	34	46º 22' 04.95"	-0º 59' 26.82"	6	3	0.08134	0.7333	A (3), B (2), D	A86 (3), B17 (2), D27
	Lesneven	35	48º 34' 34.68"	-4º 14' 17.58"	1	1			A	A53
	Lit-et-Mixe*	36	44º 01' 57.85"	-1º 15' 27.92"	11	5	0.107119	0.7636	D (7), F (4)	D10, D11, D28 (5), F2, F3 (3)
	Mauleon*	45	46º 55' 11.96"	-0º 44' 28.05"	6	5	0.01882	0.9333	D (6)	D11, D14 (2), D15, D16, D23
	Pont-L'Abbe	37	47º 53' 2.22"	-4º 10' 57.24"	5	5	0.013078	1	A (5)	A57, A58, A83, A84, A85
	Quintin*	38	48º 24' 12.34"	-2º 54' 36.16"	6	2	0.000532	0.3333	A (6)	A56, A58 (5)
	St. Bertrand de Comminges	46	43º 01' 40.74"	0º 43' 20.16"	12	11	0.010657	0.9848	C(12)	C52, C54(2), C55, C56, C57, C58, C59, C60, C61, C62, C63
	St. Floxel	39	49º 29' 27.66"	-1º 21' 5.04"	12	2	0.000266	0.1667	A (12)	A58, A59 (11)
	St. Jean*	47	43º 40' 12.12"	1º 30' 10.95"	10	7	0.017402	0.9333	D (10)	D17 (2), D18, D19, D20 (2), D21, D22 (2), D25
	St. Sulpice*	40	43º 46' 28.68"	1º 41' 10.74"	10	6	0.113273	0.8889	A (5), C (2), F (3)	A54, A55, A58 (3), C10 (2), F6 (2), F7
Germany	Arnbach	49	48º 34' 54"	11º 35' 42"	3	1			A (3)	A41 (3)
	Frankfurt	50	50º 06' 39.58"	8º 40' 45.96"	12	7	0.012324	0.8788	A (12)	A25 (2), A30, A32, A37, A41 (2), A76 (4), A77
	Gommern	51	52º 05'	11º 47'	12	5	0.006863	0.5758	A (12)	A1 (8), A11, A12, A41, A76
	Jessern	52	52º 01'	14º 11'	10	5	0.013362	0.8222	A (10)	A6 (2), A11, A29, A40 (4), A76 (2)
	Mecklenburg	48	53º 34' 54"	12º 59' 6"	5	2	0.000638	0.4	D (5)	D33, D34 (4)
	Petershausen uber der Glonn	53	48º 40' 54"	11º 48' 12"	10	4	0.006309	0.7778	A (10)	A38 (2), A39, A41 (3), A52 (4)
Hungary	Mende	55	47º 25' 32.91"	19º 26' 53.74"	10	4	0.001453	0.7333	G (10)	G10 (5), G11 (2), G12 (2), G13
Ireland	Aghada	56	51º 50' 17.32"	-8º 12' 22.18"	4	3			A(4)	A87(2), A116, A117
	Belgrave Castle	57	53º 19' 32.77"	-6º 15' 38.79"	1	1			C	C8
	Clonakilty (1)	58	51º 37' 15.32"	-8º 53' 38.90"	11	5	0.001682	0.7091	A(11)	A110(6), A111, A112, A113, A114(2)
	Clonakilty (2)	60	51º 37' 27.88"	-8º 53' 11.21"	3	2			A(3)	A110, A115(2)
	Dingle Peninsula	61	52º 12' 09.08"	-10º 24' 21.65"	12	5	0.020879	0.8182	B(11), C	B8(3), B24(4), B25, B26(3), C72
	Doolin	62	53° 0' 44.64"	-9° 23' 14.64"	11	4	0.00116	0.4909	C(11)	C8(8), C73, C74, C75
	Dublin	63	53º 19' 06.51"	-6º 15' 04.95"	7	1			C(7)	C15(7)
	Graffy	59	53º 58' 47.46"	-8º 59' 59.04"	11	4	0.049819	0.7091	C(6), D(5)	C8(5), C14, D11(4), D44
	Inis Oirr (1)	66	53º 03' 50.76"	-9º 30' 33.40"	12	2	0.000967	0.303	C(12)	C76(10), C77(2)
	Inis Oirr (2)	67	53º 03' 49.04"	-9º 32' 08.96"	8	2	0.000911	0.5714	C(8)	C8(4), C78(4)
	Lisdoonvarna	68	53º 01' 34.74"	-9º 17' 24.6"	14	4	0.017106	0.6264	B, C(13)	B27, C8(8), C79, C80(4)
	Mullaghmore (1)	70	54º 27' 42.72"	-8º 27' 9.66"	11	1	0		C(11)	C8(11)
	Mullaghmore (2)	71	54º 27' 26.76"	-8º 26' 54.72"	12	3	0.000918	0.4394	C(12)	C8(9), C85(2), C86
	Mullaghmore (3)	72	54º 27' 15.18"	-8º 26' 3.54"	13	4	0.00139	0.6154	C(13)	C8(8), C13(2), C86, C87(2)
	Slieve Carran (1)	73	53º 04' 42.36"	-8º 59' 57.54"	8	3	0.001082	0.6071	C(8)	C8(5), C16(2), C70
	Slieve Carran (2)	74	53º 04' 43.2"	-9º 00' 0"	4	3			C(3), D	C8(2), C16, D11
	Slieve Carran (3)	75	53º 04' 45.24"	-9º 00' 7.5"	4	4			C(4)	C8, C16, C81, C82
	Slieve Carran (4)	76	53º 04' 36.06"	-9º 00' 5.58"	2	2			C(2)	C16, C70
	Threecastles	77	52º 54'05.78"	-7º 10' 06.85"	12	7	0.050263	0.8788	C(7), D(5)	C8, C35, C46, C53(2), C64(2), D11(4), D46
	Troyswood	78	52º 42' 02.07"	-7º 18' 02.15"	4	3			C(4)	C8(2), C64, C71
Isle of Man	Little London	79	54º 14' 55.25"	-4º 32' 13.50"	11	4	0.051791	0.7091	A(6), C(5)	A120(5), A124, C83, C84(4)
	The Ayres	80	54º 24' 12.44"	-4º 24' 41.43"	12	7	0.072713	0.8939	A(4), B(6), C(2)	A120, A121, A122, A123, B8(3), B28(3), C8(2)
Italy	Casabocci	81	43º 19' 30.86"	11º 12' 36.41"	1	1			E	E1
	Empoli	83	43º 40' 34.55"	10º 58' 01.87"	2	2			A (2)	A43, A52
	Siena	82	43º 19' 05.18"	11º 19' 34.64"	7	4	0.001823	0.8095	E (7)	E2 (3), E3, E4, E5 (2)
Netherlands	Amsterdam	54	52º 19' 51.87"	4º 57' 26.58"	1	1			A	A44
Northern Ireland	Dungiven	64	54º 57' 3.36"	-6º 57' 26.88"	4	2			A(3), D	A87(3), D11
	Garron Point	65	55º 01' 35.46"	-6º 01' 15.51"	11	4	0.00232	0.7455	C(11)	C8(5), C20(2), C21, C24(3)
	Mount Sandel Wood	69	55º 06' 48.3"	-6º 38' 59.82"	4	3			A(4)	A87(2), A118, A119
Norway	Arendal	84	58º 27' 46.14"	8º 46' 13.86"	3	1			A (3)	A6 (3)
Poland	Krakow	85	50º 03' 16.82"	19º 59' 00.06"	12	2	0.000266	0.1667	A (12)	A1 (11), A6
	Milcz	86	53º 01' 56"	16º 52' 12"	10	5	0.088499	0.8667	A (3), D (5), O (2)	A1 (2), A11, D41 (3), D43 (2), O1 (2)
	Lagow	87	50º 48' 44.77"	21º 06' 15.11"	12	3	0.036513	0.4394	A (2), D (10)	A42 (2), D39 (9), D40
	Siedlce	88	52º 10' 14"	22º 17' 10"	11	2	0.000696	0.4364	A (11)	A6 (3), A12 (8)
	Strzelino	89	54º 30' 08"	16º 56' 51"	12	5	0.074863	0.7576	A (6), D (5), O	A9 (4), A10, A76, D42 (5), O2
Scotland	Ardnamurchan	91	56º 44' 32.58"	-6º 10' 50.22"	11	4	0.0058	0.4909	A (11)	A47, A49, A87 (8), A88
	Colonsay	92	56º 06' 11.62"	-6º 10' 51.25"	17	2	0.000493	0.3088	A (17)	A87 (14), A89 (3)
	Mull	93	56º 34' 42.02"	-6º 17' 00.32"	5	3	0.008293	0.7	A (5)	A47 (3), A50, A90
	Oban	94	56º 25' 39.95"	-5º 29' 02.21"	12	7	0.036683	0.7727	A (9), D (2), O3	A87 (6), A91, A92, A109, D12, D13, O3
Spain	Ainsa	102	42º 23' 42.6"	0º 11' 36.6"	1	1			C	C36
	Arriondas	99	43° 24' 35.01"	-5° 11' 25.35"	7	4	0.061821	0.9048	D(1), F(6)	F29, F30, F31(2), F32(2), D53
	Benasque	103	42º 35' 57.72"	0º 31' 37.2"	6	4	0.0437	0.8	C(6)	C17, C18(3), C19, C73
	Caldas*	90	42º 36' 20.11"	-8º 38' 35.91"	10	4	0.006947	0.7333	D (10)	D1, D2 (2), D3 (5), D4 (2)
	Carcamo*	95	42º 51' 38.65"	-3º 02' 23.60"	10	4	0.037214	0.7111	D, F (9)	D6, F6 (3), F7 (5), F8
	El Pont de Suert	104	42º 24' 32.7"	0º 44' 29.52"	10	8	0.039447	0.9556	C(10)	C27(2), C44, C45, C47, C48, C49, C50(2), C51
	Esles	100	43° 16' 53.91"	-3° 48' 4.26"	9	5	0.04098	0.75	D(8), F	F28, D49(4), D54, D57(3)
	Foz*	96	43º 33' 55.04"	-7º 15' 24.01"	12	6	0.002996	0.8485	F (12)	F9 (4), F10 (2), F11 (3), F12, F13, F14
	La Pobla de Segur	105	42º 15' 38.58"	0º 59' 18.36"	8	6	0.031442	0.9286	C(8)	C5(2), C25, C26, C27(2), C28, C29
	La Seu D'Urgell (1)	106	42º 21' 16.44"	1º 29' 45.3"	11	7	0.020705	0.8727	C (11)	C1, C2, C3, C5 (2), C6 (4), C9, C11
	La Seu D'Urgell (2)	107	42º 21' 35.34"	1º 28' 46.38"	6	5	0.026794	0.9333	C (6)	C1, C4, C7, C8 (2), C12
	Roncevalles (1)	108	43º 00' 33.48"	-1º 19' 8.64"	10	8	0.055219	0.9556	D, F(9)	D45, F15(2), F16, F17, F20(2), F21, F22, F23
	Roncevalles (2)	109	43º 00' 33.48"	1º 19' 8.64"	3	3			F(3)	F18, F19, F27
	Sabinanigo	110	42º 24' 38.94"	-0º 23' 35.22"	3	2			C(3)	C22, C23(2)
	San Roque de Rio Miera	101	43° 14' 4.86"	-3° 42' 7.69"	3	3			D(3)	D49, D55, D56
	Santander (1)	97	43º 24' 51.94"	-3º 44' 28.55"	12	4	0.099198	0.6818	D(6), F(6)	D47, D48, D49(4), F24(6)
	Santander (2)	98	43º 29' 13.44"	-3º 47' 33.66"	10	6	0.092362	0.8889	D(6), F(4)	D49, D50(2), D51, D52(2), F25, F26(3)
	Seira	111	42º 26' 34.44"	0º 23' 15.9"	5	4	0.029665	0.9	C(5)	C66, C67, C68, C69(2)
Sweden	Uppsala	112	59º 49' 21.77"	17º 37' 50.85"	3	2			A (2), D	A76 (2), D32
	Ystad	113	55º 26' 7.02"	13º 54' 52.68"	4	2			A (4)	A11 (2), A36 (2)
Switzerland	Le Pont	114	46º 39' 56.16"	6º 18' 19.38"	8	2	0.001196	0.25	A (8)	A60 (7), A61
* Site previously sampled but only 16S rRNA sequences used (Thomaz et al. 1996) previously
# Five or more samples
