# Supplementary material for: Irish Cepaea nemoralis Land Snails Have a Cryptic Franco-Iberian Origin That Is Most Easily Explained by the Movements of Mesolithic Humans
Source: PLoS One. 2013 Jun 19;8(6):e65792. doi: 10.1371/journal.pone.0065792 (PMC3686809; doi:10.1371/journal.pone.0065792)
Supplement: Table S2 — Mitochondrial 16S rRNA haplotypes found at each site. (XLSX) [file pone.0065792.s003.xlsx]

## Sheet: Table S2
Country	Site	Group	Individual haplotypes
Belgium	Kessel-lo	D (2)	D2, D5
	Moortsele	A	A14
Croatia	Karlovac	G	G2
	Zagreb	G	G1
Denmark	Aalborg	A (2)	A16 (2)
	Hilleroed	A	A16
	Skagen	A	A16
	Thisted	A	A11
England	Fridaythorpe (1)	B	B3
	Hampton	B	B3
	Levant Mine (2), Cornwall	A	A22
	Malham	B	B3
	St. Just (1)	A	A3
	St. Bees	B	B3
	Truro (1)	A	A22
	Truro (3)	A	A2
	Truro (4)	A	A2
	Truro (5)	A	A22
	Truro (6)	A	A4
	Truro (7)	A	A2
France	Alencon	A	A9
	Ascou	C	C7
	Ax-les-Thermes	C	C8
	Bagneres de Luchon	C	C12
	Bayonne	D (2)	D3, D7
	Carol	C	C8
	Chantonnay	B	B3
	Fort Bloque	A	A1
	Le Sableau	A, B, D	A22, B1, D8
	Lit-et-Mixe	D (2), F	D4, D10, F5
	Mauleon	D (3)	D14, D16, D17
	Quintin	A	A12
	St. Bertrand de Comminges	C	C15
	St. Floxel	A	A12
	St. Jean	D	D15
	St. Sulpice	A, C, F	A12, C2, F3
Germany	Arnbach	A	A9
	Frankfurt	A	A15
	Gommern	A	A7
	Jessern	A	A7
	Mecklenburg	D	D6
	Petershausen uber der Glonn	A (2)	A10, A12
Hungary	Hungary	G	G3
Ireland	Clonakilty	A (2)	A23 (2)
	Clonakilty (1)	A (3)	A24 (3)
	Dingle Peninsula	B (2)	B2, B3 (2)
	Dublin	C	C8
	Graffy	C, D	C8, D14
	Mullaghmore (1)	C	C9
	Mullaghmore (2)	C	C9
	Mullaghmore (3)	C (2)	C9 (2)
	Slieve Carran (1)	C	C8
	Troyswood	C	C8
Isle of Man	Isle of Man	A, C	A21, C10
	The Ayres	B, C	B3, C8
Italy	Casabocci	E	E2
	Siena	E (2)	E1, E3
Netherlands	Amsterdam	A	A12
Northern Ireland	Dungiven	A, D	A22, D14
	Mount Sandel Wood	A	A22
Poland	Krakow	A	A20
	Milcz	A (2), D	A16, A18, D11
	Lagow	A,D	A8, D9
	Siedlce	A	A19
	Strzelino	A (2), D	A5, A17, D13
Scotland	Ardnamurchan	A	A22
	Colonsay	A	A22
	Oban	A (2)	A22 (2)
	Mull	A	A22
	Ainsa	C	C14
	Benasque	C (2)	C5, C16
Spain	Carcamo	D, F	D14, F1
	Foz	F	F2
	La Pobla de Segur	C (2)	C6, C11
	La Seu D'Urgell (1)	C (3)	C1, C3, C8
	La Seu D'Urgell (2)	C	C4
	Roncevalles (2)	F	F6
	Sabinanigo	C	C13
	Santander	D, F	D1, F4
Sweden	Uppsala	A, D	A6, D12
Switzerland	Le Pont	A	A13
