# Supplementary material for: Irish Cepaea nemoralis Land Snails Have a Cryptic Franco-Iberian Origin That Is Most Easily Explained by the Movements of Mesolithic Humans
Source: PLoS One. 2013 Jun 19;8(6):e65792. doi: 10.1371/journal.pone.0065792 (PMC3686809; doi:10.1371/journal.pone.0065792)
Supplement: Table S3 — Estimates of pairwise population structure between sites. (XLSX) [file pone.0065792.s004.xlsx]

## Sheet: Table S3
FST between sites; non-significant values (P > 0.05) highlighted	Ascou	Ax-les-thermes	Bagneres de Luchon	Carol	Clonakilty	Graffy	Dingle	Doolin	Dublin	Garron Point	Innis Oirr 1	Innis Oirr 2	Lisdoonvarna	Mullaghmore 1	Mullaghmore 2	Mullaghmore 3	Slieve Carran 1	Threecastles	Little London	The Ayres	Santander 1	Santander 2	Benasque	El Pont de Suert	La Pobla de Segur	Roncevalles 1	Seira	St. Bertrand de Comminges	Kessel-lo	Moortsele	Zagreb	Aalborg 2	Aalborg 1	Hilleroed	Kerteminde	Roskilde	Skagen	Hampton	Levant Mine 1	Levant Mine 2	Malham	St Bees	St Just	Truro 5	Truro 6	Truro 1	Truro 7	Alencon	Bayonne
Ascou	0
Ax-les-thermes	0.31261	0
Bagneres de Luchon	0.90349	0.86881	0
Carol	0.66827	0.06179	0.90806	0
Clonakilty	0.98679	0.96514	0.94226	0.98763	0
Graffy	0.3635	0.3737	0.4875	0.38177	0.72791	0
Dingle	0.88277	0.87477	0.81904	0.88844	0.89086	0.66549	0
Doolin	0.56292	0.08696	0.90638	0.03576	0.98481	0.38997	0.89035	0
Dublin	0.87453	0.36209	0.89702	0.82619	0.9889	0.35016	0.87152	0.68313	0
Garron Point	0.46037	0.10714	0.89337	0.10354	0.97837	0.38097	0.88517	0.07692	0.53614	0
Innis Oirr 1	0.73239	0.33184	0.91283	0.5924	0.98609	0.42106	0.89615	0.51237	0.81055	0.43925	0
Innis Oirr 2	0.66346	0.14585	0.8941	0.34723	0.98545	0.3505	0.87703	0.2418	0.7971	0.20958	0.60575	0
Lisdoonvarna	0.07681	0.00193	0.74026	-0.02872	0.89083	0.30604	0.80769	-0.00769	0.06616	0.00256	0.1	-0.00075	0
Mullaghmore 1	0.79845	0.10526	0.91883	0.12438	0.99095	0.3993	0.89533	0	1	0.11111	0.68631	0.48837	-0.00716	0
Mullaghmore 2	0.61211	0.118	0.91316	0.12122	0.98628	0.41007	0.89556	0.06637	0.73387	0.12332	0.55682	0.31143	0.00598	0.12522	0
Mullaghmore 3	0.5317	0.1063	0.91133	0.06013	0.98366	0.42008	0.89701	0.0296	0.63134	0.09607	0.49216	0.23386	0.00686	0.03894	0.02513	0
Slieve Carran 1	0.59552	0.0766	0.89182	0.1113	0.98465	0.33802	0.87616	0.04694	0.738	0.09026	0.53654	0.28571	-0.02574	0.1465	0.11933	0.06588	0
Threecastles	0.31113	0.32218	0.47559	0.3268	0.71894	-0.0882	0.66043	0.33443	0.30024	0.32641	0.36672	0.29816	0.25918	0.34298	0.35387	0.36291	0.28515	0
Little London	0.46901	0.46663	0.54233	0.47381	0.4299	0.28951	0.66732	0.48484	0.43736	0.47207	0.50831	0.44191	0.4023	0.49117	0.50126	0.50848	0.43849	0.28001	0
The Ayres	0.54787	0.55799	0.47881	0.56036	0.46354	0.34737	0.22632	0.57094	0.51321	0.56388	0.58794	0.53074	0.49665	0.57536	0.58471	0.59319	0.52898	0.3497	0.21411	0
Santander 1	0.59449	0.60996	0.52144	0.61093	0.63419	0.40784	0.58706	0.62068	0.56618	0.61663	0.63273	0.58022	0.59413	0.62474	0.63344	0.64354	0.57972	0.41693	0.46042	0.40118	0
Santander 2	0.59829	0.61619	0.5215	0.61767	0.63668	0.35455	0.57181	0.62763	0.56926	0.62332	0.6419	0.58408	0.58894	0.63304	0.64341	0.65297	0.58412	0.36662	0.42584	0.34701	0.05674	0
Benasque	0.68654	0.67083	0.58387	0.69778	0.82083	0.30084	0.71407	0.70539	0.6535	0.69084	0.72556	0.66141	0.56684	0.71788	0.72286	0.72798	0.65512	0.29184	0.37858	0.35223	0.41943	0.39753	0
El Pont de Suert	0.57863	0.56791	0.57345	0.58462	0.79099	0.29536	0.71394	0.59316	0.54905	0.58153	0.61496	0.55308	0.48507	0.60242	0.60982	0.61546	0.54543	0.28086	0.38475	0.39736	0.47021	0.45254	-0.05064	0
La Pobla de Segur	0.47573	0.44567	0.41333	0.47305	0.85158	0.2263	0.74997	0.48092	0.44331	0.47047	0.51551	0.43651	0.31749	0.49631	0.50281	0.51039	0.42957	0.19847	0.34854	0.40157	0.47001	0.46182	0.36766	0.30913	0
Roncevalles	0.84069	0.84368	0.80203	0.8491	0.84867	0.71057	0.80084	0.85375	0.82301	0.85082	0.85993	0.83138	0.82045	0.85733	0.86122	0.8654	0.83204	0.71075	0.70687	0.64515	0.3521	0.43446	0.72126	0.74365	0.75715	0
Seira	0.81032	0.78238	0.29951	0.81952	0.88804	0.35626	0.75107	0.82291	0.78818	0.80544	0.83279	0.79147	0.65138	0.83649	0.83515	0.83694	0.78815	0.3491	0.4252	0.36872	0.4295	0.41505	0.30628	0.35516	0.29801	0.74526	0
St. Bertrand de Comminges	0.88884	0.86447	0.52235	0.89211	0.93146	0.55231	0.82987	0.89185	0.88269	0.88054	0.89886	0.88082	0.76274	0.90061	0.89706	0.89654	0.87922	0.54003	0.59985	0.53189	0.57736	0.58521	0.64817	0.62381	0.53437	0.82919	0.40281	0
Kessel-lo	0.82794	0.82548	0.73513	0.8387	0.85264	0.47725	0.75788	0.84156	0.81943	0.83586	0.84717	0.82116	0.77323	0.84741	0.84956	0.85284	0.82135	0.48964	0.61591	0.51418	0.46335	0.42603	0.60266	0.61929	0.66896	0.77116	0.63923	0.76747	0
Moortsele	0.99476	0.97147	0.94925	0.99532	0.93907	0.73504	0.89326	0.99197	0.998	0.98536	0.99292	0.99392	0.89447	0.9984	0.99316	0.99015	0.99311	0.72551	0.5162	0.49893	0.62614	0.63267	0.81533	0.78977	0.85257	0.84794	0.89255	0.93667	0.85718	0
Zagreb	0.96652	0.95787	0.9392	0.96834	0.96687	0.83618	0.91135	0.96826	0.96331	0.96494	0.96993	0.96396	0.92195	0.97152	0.97036	0.97014	0.96347	0.83115	0.82784	0.76429	0.67605	0.71452	0.87375	0.86509	0.89045	0.82047	0.90783	0.94323	0.89133	0.96681	0
Aalborg 2	0.95575	0.92969	0.88001	0.95896	0.72419	0.62741	0.83015	0.957	0.95311	0.9476	0.96068	0.95077	0.83787	0.96558	0.96083	0.95871	0.94951	0.62219	0.35648	0.35253	0.52105	0.51469	0.69078	0.69525	0.75437	0.77855	0.77716	0.88665	0.78903	0.5876	0.93654	0
Aalborg 1	0.9881	0.95955	0.92527	0.98923	0.90764	0.67547	0.86114	0.98537	0.99136	0.9769	0.98699	0.98638	0.8681	0.99354	0.98727	0.98386	0.98529	0.66791	0.44026	0.41428	0.56227	0.56569	0.75473	0.74158	0.80348	0.80788	0.84288	0.9185	0.82188	0.872	0.95498	0.13994	0
Hilleroed	0.99186	0.96901	0.9454	0.99254	0.92629	0.73376	0.89152	0.98937	0.99471	0.98276	0.99046	0.99082	0.89271	0.99575	0.99068	0.9878	0.99001	0.72367	0.51819	0.4988	0.62567	0.63744	0.81366	0.79014	0.8502	0.84688	0.88943	0.93446	0.85564	0.85333	0.96512	0.54164	0.83395	0
Kerteminde	0.97152	0.94321	0.89881	0.97378	0.62832	0.63997	0.83945	0.97077	0.97186	0.9616	0.97351	0.96803	0.84934	0.97943	0.97373	0.97089	0.96682	0.63429	0.32317	0.33336	0.53735	0.5232	0.71162	0.70471	0.77413	0.78947	0.80042	0.89769	0.80026	0.87164	0.94678	0.52055	0.80578	0.85542	0
Roskilde	0.97884	0.95857	0.93448	0.97999	0.8672	0.73208	0.88603	0.97764	0.97988	0.97125	0.97928	0.97699	0.887	0.98359	0.97943	0.97717	0.9762	0.72327	0.51807	0.50121	0.62764	0.64041	0.80679	0.78563	0.84396	0.8463	0.87833	0.92596	0.85014	0.61835	0.96067	0.4711	0.66857	0.60414	0.7804	0
Skagen	0.9681	0.94865	0.9217	0.96966	0.82022	0.72206	0.87665	0.96779	0.96792	0.96118	0.96994	0.96554	0.87706	0.97377	0.97004	0.96812	0.96472	0.71345	0.49788	0.48619	0.62424	0.63344	0.79548	0.77707	0.83122	0.84144	0.86301	0.91644	0.84455	0.4852	0.95535	0.21681	0.33858	0.48323	0.72171	0.25777	0
Hampton	0.9881	0.96711	0.9387	0.98917	0.98229	0.7299	0.32282	0.9864	0.99001	0.98034	0.98772	0.98688	0.88954	0.99245	0.98789	0.98544	0.98609	0.72213	0.72274	0.31299	0.60133	0.5968	0.80989	0.78683	0.84644	0.82612	0.87849	0.92874	0.8262	0.99004	0.96053	0.94912	0.98137	0.98734	0.96407	0.97532	0.96523	0
Levant Mine 1	0.97766	0.95078	0.91486	0.97925	0.57481	0.66392	0.86403	0.97609	0.97917	0.9677	0.97823	0.97514	0.86161	0.98403	0.97844	0.97551	0.974	0.6564	0.30977	0.37966	0.56976	0.56539	0.75471	0.73431	0.79883	0.81052	0.83464	0.90854	0.81268	0.91887	0.95552	0.6837	0.87485	0.90605	0.56241	0.84755	0.80107	0.97251	0
Levant Mine 2	0.9855	0.96206	0.93638	0.98645	0.64588	0.71213	0.885	0.98343	0.98771	0.97642	0.98487	0.98397	0.88275	0.9901	0.98507	0.98226	0.98311	0.70303	0.37378	0.43475	0.62076	0.62142	0.80793	0.77922	0.83788	0.83981	0.8766	0.92585	0.84241	0.94489	0.96497	0.75244	0.91439	0.93316	0.65903	0.87976	0.83746	0.98105	0.07466	0
Malham	0.99637	0.98015	0.96131	0.99677	0.99196	0.79564	0.04298	0.99442	0.9986	0.98996	0.99504	0.9959	0.91803	0.99886	0.9952	0.99307	0.99536	0.78639	0.7922	0.38262	0.67845	0.68232	0.87335	0.8439	0.89228	0.87291	0.92253	0.94777	0.86809	0.99756	0.97458	0.97305	0.99363	0.99557	0.98289	0.98631	0.97886	0.89524	0.98732	0.99152	0
St Bees	0.97858	0.96201	0.93336	0.97998	0.97446	0.75594	0.02673	0.97812	0.97873	0.97303	0.97969	0.97709	0.89421	0.98316	0.97977	0.97805	0.97644	0.74791	0.75298	0.32946	0.63575	0.63304	0.82953	0.80686	0.85714	0.84529	0.88272	0.92413	0.8362	0.9801	0.96028	0.9437	0.97007	0.97788	0.95508	0.96817	0.95947	0.70992	0.96475	0.97297	0.14234	0
St Just	0.98227	0.96078	0.9385	0.98323	0.68284	0.72645	0.8915	0.98056	0.98394	0.974	0.98204	0.98067	0.88582	0.98673	0.9822	0.97966	0.97987	0.71671	0.39251	0.46029	0.64039	0.64184	0.81955	0.78846	0.84701	0.85217	0.88493	0.92822	0.84977	0.93044	0.96622	0.75112	0.90184	0.92012	0.63813	0.87164	0.83233	0.97913	0.30447	0.33239	0.98929	0.97214	0
Truro 5	0.97246	0.94458	0.90335	0.97448	0.5502	0.64791	0.8536	0.97146	0.97315	0.96255	0.97402	0.9693	0.85267	0.97985	0.97423	0.97137	0.96813	0.64111	0.28681	0.35529	0.54901	0.5422	0.73321	0.7186	0.78135	0.79698	0.8139	0.90003	0.80273	0.90119	0.95074	0.64371	0.84889	0.88819	0.51875	0.83121	0.78411	0.96673	0.03362	0.10195	0.98433	0.95976	0.24733	0
Truro 6	0.97585	0.95547	0.93069	0.97704	0.56077	0.72453	0.88694	0.97476	0.9767	0.9683	0.97651	0.97387	0.88299	0.98074	0.97664	0.9744	0.97308	0.7154	0.39068	0.45593	0.63976	0.64183	0.81576	0.78762	0.84221	0.84887	0.87643	0.92229	0.8479	0.90712	0.96354	0.72869	0.87472	0.89801	0.6068	0.85455	0.81664	0.97282	0.06441	0.01398	0.98467	0.96708	0.24754	0.01155	0
Truro 1	0.98726	0.96579	0.9438	0.98804	0.67001	0.73397	0.89532	0.98521	0.98942	0.97886	0.98644	0.986	0.89193	0.99127	0.98663	0.98399	0.98523	0.72431	0.40462	0.46585	0.64695	0.64992	0.82944	0.79798	0.85424	0.85485	0.89208	0.93257	0.85589	0.95197	0.96878	0.78213	0.92577	0.94142	0.69558	0.89268	0.8529	0.98345	0.10559	0.0399	0.99243	0.97581	0.36364	0.11271	0.05384	0
Truro 7	0.98023	0.9526	0.91667	0.9817	0.6731	0.66604	0.86361	0.97831	0.98223	0.96984	0.98032	0.97792	0.86177	0.98639	0.98055	0.97743	0.97684	0.65816	0.31351	0.37813	0.57296	0.5683	0.75846	0.73813	0.79906	0.81117	0.83708	0.90912	0.81656	0.93055	0.95686	0.70276	0.88909	0.91748	0.62628	0.85977	0.81366	0.97488	0.30303	0.37057	0.98899	0.9665	0.34475	0.19231	0.25727	0.4121	0
Alencon	0.96132	0.94331	0.91661	0.96302	0.74428	0.72267	0.87174	0.96159	0.96036	0.95531	0.96394	0.95847	0.87548	0.96718	0.96399	0.96241	0.95768	0.71457	0.48752	0.47143	0.63645	0.63798	0.79884	0.77629	0.83435	0.84715	0.86077	0.91226	0.84316	0.85065	0.95632	0.63023	0.81229	0.84331	0.52344	0.80669	0.77225	0.95826	0.7386	0.77769	0.97258	0.95271	0.77069	0.70687	0.75751	0.79661	0.76035	0
Bayonne	0.88173	0.8715	0.7916	0.89085	0.89881	0.50247	0.78795	0.89238	0.87368	0.88523	0.89723	0.8746	0.80361	0.89947	0.89943	0.90102	0.87456	0.51083	0.61897	0.50795	0.44571	0.40883	0.63065	0.63908	0.69788	0.77002	0.68577	0.8178	-0.0034	0.90543	0.91284	0.83218	0.87172	0.90318	0.84475	0.8946	0.88722	0.87657	0.86074	0.88971	0.91637	0.88346	0.89537	0.84922	0.89169	0.90185	0.86486	0.88282	0
Fort Bloque	0.97469	0.95341	0.92689	0.97608	0.71304	0.71562	0.88187	0.97376	0.97533	0.96694	0.9757	0.97243	0.87861	0.98011	0.97584	0.97358	0.97158	0.70705	0.4077	0.4565	0.62406	0.62721	0.80308	0.778	0.83274	0.83699	0.86775	0.91993	0.84121	0.91228	0.95893	0.74105	0.8787	0.90323	0.67033	0.85767	0.82653	0.97128	0.49244	0.55338	0.98435	0.96552	0.59835	0.46497	0.50699	0.58683	0.57724	0.77982	0.88384
Chantonnay	0.76625	0.76574	0.64376	0.7807	0.67264	0.46279	0.21927	0.78933	0.73139	0.78012	0.80328	0.74846	0.68232	0.79688	0.80218	0.80821	0.74688	0.46548	0.35422	-0.07251	0.40032	0.35401	0.45546	0.51616	0.55048	0.67676	0.49666	0.70524	0.61178	0.65189	0.83651	0.43171	0.52045	0.64895	0.48002	0.64301	0.61492	0.41165	0.58446	0.65879	0.49145	0.39138	0.68602	0.54735	0.67724	0.69483	0.58455	0.64306	0.62111
La Roche-Bernard	0.97999	0.9612	0.92503	0.98154	0.97457	0.73082	0.49742	0.9794	0.98033	0.97366	0.98111	0.97826	0.88888	0.98511	0.98123	0.97928	0.97735	0.72534	0.7278	0.36465	0.59177	0.5963	0.80196	0.78561	0.83883	0.82448	0.86232	0.91807	0.82171	0.98135	0.95665	0.93653	0.96948	0.97872	0.95083	0.96728	0.95735	0.88166	0.96264	0.97282	0.90851	0.80421	0.97206	0.9564	0.966	0.97618	0.96494	0.9498	0.86867
Le Sableau	0.67082	0.67906	0.54116	0.68798	0.42635	0.36483	0.43681	0.69964	0.6321	0.69011	0.7156	0.64964	0.61268	0.70636	0.71539	0.72411	0.6477	0.37298	0.18858	-0.0207	0.35035	0.29468	0.36029	0.42796	0.46526	0.64294	0.38966	0.61453	0.47739	0.50634	0.79802	0.28258	0.38182	0.50505	0.25062	0.50401	0.4831	0.51626	0.29125	0.37721	0.63314	0.56	0.41499	0.25649	0.40506	0.42144	0.30087	0.45666	0.46723
Lite-et-Mixe	0.55678	0.57521	0.46468	0.57672	0.60802	0.3218	0.54369	0.58678	0.52881	0.58328	0.59784	0.54122	0.55836	0.59182	0.60268	0.61303	0.54301	0.33489	0.4151	0.3489	0.1311	0.13307	0.35148	0.41025	0.42169	0.38527	0.35969	0.53133	0.22198	0.60616	0.67189	0.48956	0.53357	0.60569	0.50235	0.60804	0.60494	0.55898	0.53296	0.58892	0.64472	0.5968	0.60882	0.51226	0.61086	0.61769	0.53641	0.61193	0.20271
Pont-L'Abbe	0.94802	0.92232	0.86855	0.95168	0.35923	0.6146	0.82744	0.95013	0.94406	0.94054	0.95403	0.94229	0.83017	0.95884	0.95441	0.95256	0.941	0.60994	0.25999	0.31431	0.52021	0.50495	0.68333	0.68419	0.74535	0.77407	0.76174	0.87587	0.77883	0.79162	0.93629	0.43284	0.70934	0.77986	0.15301	0.72553	0.67504	0.9425	0.20013	0.2723	0.96909	0.93945	0.31756	0.15162	0.25605	0.32461	0.30348	0.44099	0.81893
Quintin	0.99343	0.9648	0.93061	0.99424	0.89567	0.6796	0.86659	0.99016	0.99752	0.982	0.99142	0.99222	0.87492	0.99815	0.99174	0.98819	0.99117	0.67245	0.42665	0.40738	0.56932	0.55994	0.76563	0.74646	0.81369	0.81242	0.8495	0.92014	0.82512	0.98132	0.96093	0.7088	0.94884	0.96601	0.64766	0.89992	0.85038	0.98683	0.86213	0.91111	0.99704	0.97428	0.88798	0.825	0.85299	0.9231	0.88785	0.51392	0.87455
St. Floxel	0.99528	0.9741	0.95473	0.99575	0.91084	0.74955	0.90108	0.9927	0.99821	0.98673	0.99353	0.99456	0.90239	0.99852	0.99375	0.99098	0.99384	0.73996	0.51661	0.5071	0.65225	0.65271	0.84075	0.80808	0.86867	0.86163	0.90622	0.94163	0.86618	0.98509	0.97276	0.79455	0.96425	0.9734	0.78052	0.92054	0.8803	0.99091	0.89596	0.92806	0.9977	0.98163	0.90542	0.87094	0.87656	0.93557	0.91636	0.65215	0.91232
St. Sulpice	0.49859	0.51457	0.39534	0.51444	0.32831	0.32061	0.51067	0.52734	0.46181	0.51977	0.54288	0.4777	0.49236	0.53126	0.54349	0.55408	0.47723	0.32724	0.18765	0.19158	0.16254	0.16946	0.27894	0.35327	0.34513	0.43196	0.27848	0.46045	0.45917	0.34538	0.66533	0.17994	0.26129	0.34593	0.18231	0.34947	0.33853	0.53505	0.25377	0.31784	0.62325	0.5714	0.34342	0.22797	0.34384	0.35339	0.26091	0.30591	0.4377
Mauleon	0.91571	0.89839	0.81463	0.92314	0.92225	0.39278	0.8081	0.9231	0.90771	0.91481	0.92911	0.91049	0.81511	0.93141	0.92899	0.92896	0.90872	0.41515	0.59984	0.49255	0.43161	0.3753	0.62863	0.63836	0.69867	0.76444	0.68957	0.83383	0.54531	0.93287	0.92822	0.85408	0.90324	0.92992	0.86877	0.91803	0.90839	0.91297	0.88949	0.91672	0.94752	0.91602	0.92171	0.87642	0.91459	0.92714	0.89359	0.90155	0.62103
St Jean	0.90035	0.88997	0.8199	0.90735	0.90928	0.48796	0.81565	0.90802	0.89204	0.9019	0.91358	0.89615	0.8241	0.91438	0.91337	0.91428	0.89491	0.50201	0.65066	0.54857	0.50409	0.45457	0.68302	0.68395	0.73445	0.79462	0.72588	0.83528	0.58336	0.91842	0.9273	0.85915	0.89414	0.91634	0.86747	0.90809	0.90088	0.89821	0.88132	0.9036	0.93026	0.90332	0.90873	0.87177	0.90361	0.91316	0.88436	0.89513	0.64553
Mecklenburg	0.99307	0.96365	0.91601	0.99416	0.98772	0.59945	0.85585	0.98993	0.9975	0.98172	0.99112	0.99186	0.87354	0.99818	0.99165	0.98814	0.99086	0.59963	0.67626	0.5506	0.46272	0.44579	0.72759	0.71432	0.78704	0.79256	0.81445	0.90909	0.114	0.99638	0.95769	0.94918	0.9888	0.99322	0.96832	0.97898	0.96834	0.98547	0.97661	0.9863	0.99687	0.97217	0.98318	0.97002	0.97641	0.98844	0.98013	0.96115	0.18154
Frankfurt	0.92141	0.90662	0.86801	0.92441	0.32556	0.68405	0.84244	0.92468	0.91628	0.91776	0.92877	0.91615	0.84101	0.9302	0.92863	0.92827	0.91525	0.67735	0.3674	0.41067	0.6079	0.60583	0.7462	0.73649	0.78595	0.82308	0.80133	0.87233	0.81034	0.53881	0.93577	0.27849	0.49754	0.53696	0.16423	0.49835	0.45472	0.922	0.29805	0.33797	0.94495	0.9218	0.35488	0.27901	0.34525	0.37349	0.34396	0.49804	0.84506
Gommern	0.95536	0.93786	0.9095	0.95726	0.71765	0.71852	0.87007	0.95606	0.95379	0.94963	0.95869	0.95214	0.87001	0.96169	0.95871	0.95729	0.95133	0.71037	0.47271	0.47372	0.6278	0.63496	0.7867	0.77056	0.82403	0.84138	0.85119	0.90629	0.83849	0.37583	0.95066	0.27269	0.4588	0.38262	0.58694	0.15493	0.09122	0.9535	0.70169	0.74581	0.96939	0.94953	0.74332	0.68577	0.73173	0.76815	0.72035	0.70104	0.87863
Jessern	0.92245	0.90638	0.86541	0.92586	0.39442	0.66821	0.83405	0.92612	0.9167	0.91879	0.93051	0.91671	0.83637	0.93219	0.93039	0.93	0.91574	0.66206	0.36708	0.39212	0.58608	0.58162	0.72801	0.72185	0.77548	0.81125	0.79164	0.87145	0.80278	0.47696	0.93249	0.19583	0.44015	0.47582	0.1177	0.43031	0.37482	0.92079	0.40497	0.4583	0.94614	0.92057	0.46069	0.38125	0.45967	0.49329	0.44085	0.46727	0.83824
Petershausen uber der Glonn	0.9629	0.94364	0.91228	0.96478	0.67544	0.70992	0.86507	0.96319	0.96191	0.9565	0.96565	0.95986	0.87199	0.96924	0.96574	0.96403	0.95902	0.70238	0.45498	0.44343	0.61318	0.60982	0.78392	0.76477	0.82307	0.83298	0.84915	0.90826	0.83552	0.8364	0.95384	0.56699	0.78899	0.82735	0.16133	0.77532	0.74139	0.95857	0.68044	0.73264	0.97402	0.95244	0.71894	0.64863	0.70604	0.7546	0.7087	0.45081	0.87538
Mende	0.99427	0.98295	0.97216	0.99472	0.99204	0.86282	0.93671	0.9932	0.9954	0.98999	0.99375	0.99366	0.94442	0.99639	0.99395	0.99259	0.99323	0.85638	0.85771	0.79422	0.70698	0.75264	0.91138	0.89345	0.92409	0.85172	0.94786	0.9678	0.91634	0.99518	0.59847	0.97649	0.99153	0.9937	0.98455	0.98752	0.98244	0.99092	0.98788	0.99158	0.99618	0.98579	0.99042	0.98556	0.98757	0.99256	0.98915	0.98009	0.94358
Siena	0.99252	0.9768	0.96181	0.99332	0.98996	0.81533	0.91089	0.99121	0.99424	0.98669	0.99206	0.99171	0.9245	0.99572	0.99225	0.9904	0.99113	0.80812	0.80839	0.72119	0.63751	0.67484	0.87388	0.8538	0.89344	0.80752	0.92174	0.95654	0.88812	0.99452	0.95685	0.96657	0.98896	0.99259	0.97795	0.98416	0.97733	0.98775	0.98384	0.98924	0.99532	0.98044	0.98782	0.98017	0.98394	0.99067	0.98547	0.9735	0.92071
Oban	0.77012	0.76764	0.6958	0.77806	0.18213	0.50119	0.7298	0.78375	0.75295	0.77554	0.79383	0.75834	0.71415	0.78879	0.79289	0.79693	0.75657	0.50422	0.19125	0.28156	0.50887	0.4746	0.56263	0.58411	0.62284	0.74824	0.60027	0.72931	0.65774	0.47371	0.86833	0.2842	0.40959	0.47374	0.16536	0.46665	0.44906	0.78254	0.03607	0.08261	0.83939	0.80572	0.13565	0.02732	0.09637	0.106	0.08036	0.39045	0.67437
Krakow	0.99526	0.97403	0.95484	0.99574	0.94356	0.75447	0.90192	0.99268	0.9982	0.98667	0.99352	0.99454	0.90226	0.99852	0.99373	0.99095	0.99383	0.7445	0.5451	0.52501	0.64964	0.66358	0.83684	0.80884	0.86675	0.86118	0.90582	0.94181	0.86842	0.90986	0.97067	0.61361	0.88118	0.85589	0.88124	0.39832	0.23588	0.99109	0.92525	0.94935	0.99773	0.9819	0.93542	0.91141	0.91375	0.95546	0.93736	0.86093	0.91497
Milcz	0.5626	0.57948	0.44454	0.58263	0.49081	0.3036	0.53635	0.59362	0.53747	0.58628	0.60629	0.54667	0.54613	0.59875	0.60898	0.61943	0.54726	0.31533	0.27975	0.22948	0.30861	0.25454	0.30308	0.36952	0.3973	0.61119	0.32311	0.52254	0.20213	0.46658	0.73465	0.33047	0.38775	0.46482	0.36204	0.46742	0.46249	0.571	0.40982	0.47511	0.65955	0.60846	0.49314	0.3876	0.49974	0.50845	0.41187	0.49249	0.19043
Lagow	0.78617	0.78626	0.68872	0.79827	0.79087	0.48686	0.72159	0.80261	0.77462	0.79668	0.80851	0.77701	0.738	0.80824	0.81199	0.81632	0.77807	0.49478	0.54755	0.45467	0.45122	0.41174	0.55876	0.58315	0.62841	0.74918	0.58719	0.72762	0.04139	0.79694	0.86959	0.71123	0.75083	0.79548	0.71863	0.79062	0.78486	0.78562	0.73827	0.77657	0.83364	0.79836	0.78585	0.72562	0.78608	0.79474	0.74316	0.78219	0.04078
Siedlce	0.99263	0.97056	0.94931	0.99324	0.92743	0.74193	0.89346	0.99015	0.99544	0.9838	0.99116	0.99169	0.89601	0.99628	0.99138	0.98856	0.99093	0.73224	0.52493	0.49967	0.63584	0.64848	0.82381	0.79755	0.85685	0.85334	0.896	0.93709	0.86027	0.82296	0.96755	0.54712	0.8243	0.77306	0.85926	0.47391	0.39375	0.98808	0.90911	0.93497	0.99591	0.97863	0.92127	0.89199	0.89916	0.94281	0.92048	0.84432	0.90796
Strzelino	0.5839	0.59593	0.47827	0.59957	0.4123	0.33889	0.55271	0.60935	0.56092	0.60137	0.62098	0.56832	0.56015	0.6139	0.62314	0.63175	0.56871	0.34787	0.23124	0.20584	0.35581	0.30713	0.33657	0.39915	0.42752	0.64	0.3605	0.54381	0.30077	0.37616	0.75234	0.2395	0.29594	0.36314	0.29311	0.37563	0.36545	0.59149	0.32137	0.38075	0.66962	0.62282	0.39552	0.30253	0.40518	0.41333	0.3265	0.43107	0.29737
Caldas	0.95882	0.94063	0.90139	0.96201	0.962	0.64563	0.86453	0.96058	0.95861	0.95384	0.9632	0.95679	0.87133	0.96656	0.96327	0.9617	0.95577	0.64219	0.71691	0.61204	0.56285	0.54026	0.7617	0.7423	0.80771	0.83364	0.8323	0.90052	0.72911	0.96778	0.95383	0.92577	0.95493	0.96557	0.9383	0.95594	0.94778	0.95484	0.94831	0.95967	0.97211	0.95065	0.95949	0.94196	0.95493	0.96388	0.95048	0.94183	0.79167
Ardnamurchan	0.96162	0.94182	0.91251	0.96341	0.38571	0.70314	0.87147	0.96172	0.96081	0.95484	0.9642	0.9586	0.8683	0.9679	0.96427	0.96245	0.95773	0.69489	0.36383	0.42725	0.62095	0.61958	0.78834	0.76523	0.82154	0.83672	0.85127	0.90776	0.83196	0.84095	0.95547	0.61871	0.79895	0.83233	0.39139	0.78904	0.75	0.95912	0.07113	0.06829	0.975	0.95503	0.19987	0.05691	0.07188	0.09108	0.24743	0.61352	0.8739
Colonsay	0.99381	0.97584	0.96025	0.99422	0.77509	0.77933	0.9164	0.99169	0.99608	0.98657	0.99243	0.99314	0.91232	0.99662	0.99261	0.99023	0.99254	0.7689	0.47171	0.52883	0.6973	0.70502	0.86973	0.83595	0.88657	0.88299	0.92185	0.94756	0.88272	0.97806	0.97695	0.85115	0.96166	0.96895	0.7948	0.92633	0.89313	0.99064	0.19248	0.07688	0.99651	0.98349	0.47235	0.24004	0.08043	0.09643	0.55321	0.84395	0.92524
Isle of Mull	0.96585	0.93829	0.89249	0.96846	0.69327	0.63523	0.83728	0.96582	0.96513	0.95658	0.9689	0.96183	0.84516	0.97447	0.9691	0.96652	0.96059	0.62977	0.33841	0.34337	0.53299	0.52176	0.70494	0.69968	0.76943	0.78758	0.79297	0.89357	0.79666	0.87224	0.94442	0.54204	0.80673	0.85888	0.35083	0.801	0.75164	0.95906	0.63801	0.72054	0.97948	0.95131	0.71147	0.5786	0.67971	0.75205	0.67962	0.03768	0.83983
Carcamo	0.88406	0.88318	0.85681	0.88937	0.8941	0.76561	0.85152	0.89188	0.87449	0.88926	0.89573	0.87829	0.85994	0.89481	0.89674	0.8991	0.87827	0.76356	0.77414	0.72248	0.32043	0.51561	0.78995	0.79565	0.81366	0.41998	0.81687	0.87145	0.81542	0.89267	0.85586	0.85001	0.86916	0.89177	0.85973	0.88998	0.88607	0.87974	0.87116	0.8894	0.90878	0.88972	0.89643	0.86383	0.89396	0.8986	0.87292	0.88918	0.82426
Foz	0.98982	0.9804	0.96989	0.99049	0.98818	0.87049	0.94163	0.98936	0.99023	0.98661	0.99001	0.98903	0.94712	0.99215	0.99022	0.98921	0.98872	0.86449	0.86886	0.81352	0.51335	0.67287	0.91638	0.8994	0.92702	0.62462	0.94772	0.96539	0.91902	0.99116	0.95943	0.97424	0.98705	0.99	0.98052	0.98484	0.98063	0.98685	0.98355	0.98756	0.99269	0.98345	0.98698	0.98118	0.98428	0.98883	0.98461	0.97806	0.94348
La Seu D'Urgell 1	0.32186	0.26222	0.67356	0.28819	0.88375	0.2614	0.80308	0.29292	0.30224	0.28934	0.3459	0.26671	0.16494	0.3068	0.31398	0.319	0.25338	0.22035	0.39078	0.485	0.54479	0.54439	0.49954	0.41907	0.11382	0.79547	0.56583	0.7205	0.74033	0.8868	0.91306	0.81755	0.85427	0.88477	0.83272	0.87778	0.86756	0.88641	0.84763	0.87396	0.91879	0.8926	0.87867	0.8362	0.87523	0.8853	0.84828	0.86812	0.77121
La Seu D'Urgell 2	0.29859	0.22425	0.61199	0.26185	0.89032	0.17748	0.78043	0.26723	0.24551	0.25128	0.33442	0.2292	0.08878	0.28923	0.29511	0.30009	0.21282	0.13857	0.30257	0.40186	0.46951	0.46069	0.41023	0.34659	-0.00396	0.75788	0.46232	0.68383	0.70557	0.89492	0.90759	0.79395	0.84972	0.89187	0.81549	0.88206	0.86832	0.88818	0.84241	0.87896	0.92923	0.89551	0.88536	0.82469	0.87955	0.89325	0.84381	0.86753	0.73889
Le Pont	0.99039	0.96544	0.93909	0.99124	0.8792	0.70595	0.87979	0.98782	0.9934	0.98056	0.98911	0.9891	0.88369	0.99486	0.98935	0.98628	0.98819	0.69782	0.462	0.45638	0.60437	0.60088	0.79724	0.77171	0.83513	0.83102	0.87466	0.92956	0.84228	0.96065	0.96327	0.66145	0.90185	0.94497	0.7721	0.8783	0.80532	0.98455	0.855	0.89836	0.99477	0.97482	0.87769	0.82828	0.84387	0.907	0.8721	0.78835	0.88956
[truncated: 33 more columns]
